# Supplementary material for: The impact of P-substituents on the structures, spectroscopic properties, and reactivities of POCOP-type pincer complexes of nickel(ii)
Source: Royal Society of Chemistry journal article supplement (doi:10.1039/c1dt10381d), 2011-01-01

## Supporting Information

For

### The Impact of P-Substituents on the Structures, Spectroscopic Properties, and Reactivities of POCOP-Type Pincer Complexes of Nickel(II)

Abderrahmen B. Salah and Davit Zargarian

Département de chimie, Université de Montréal, Montréal (Québec), Canada H3C 3J7

#### List of items :

1. Table of  $^1\text{H}$  NMR data for complexes **1-6**
2. Table of  $^{13}\text{C}$  NMR data for complexes
3. UV-Vis spectra for complexes  $(\text{POCOP}^{i\text{-Pr}})\text{Ni-OCOCH}_3$ ,  $(\text{POCOP}^{i\text{-Pr}})\text{Ni-OSO}_2\text{CF}_3$  and complexes **2-6**

**Table 1. <sup>1</sup>H NMR data for complexes 1-6**

|                                | <i>o</i> -H (qq)* | <i>m</i> -H<br>(qt)           | <i>p</i> -H (t) | H3/H5<br>(d) | H4 (t)       |
|--------------------------------|-------------------|-------------------------------|-----------------|--------------|--------------|
| <b>A</b>                       | 7.68 (8H)         | 7.16<br>(8H)                  | 7.13<br>(8H)    | 6.98<br>(8H) | 7.03<br>(8H) |
| <b>Ni-Br</b>                   | 8.25 (8H)         | 7.07 (m, 12H) p+m             |                 | 6.68<br>(8H) | 7.13<br>(8H) |
| <b>Ni-CN</b>                   | 8.22 (m)          | 7.04 (m, 12H) p+m             |                 | 6.92(8)      | 7.10(8)      |
| <b>Ni-Otf</b>                  | 8.10(m)           | 7.13(m, 12H) p+m              |                 | 6.66(8)      | 6.94(8)      |
| <b>Ni-Oac</b>                  | 8.2 (m)           | 7.15(m, 12H) p+m              |                 | 6.78(8)      | 7.08(8)      |
| <b>Ni-<br/>ONO<sub>2</sub></b> | 7.91(m)           | 6.97(m, 12H) p+m              |                 | 6.78(8)      | 6.88(8)      |
| <b>Ni-<br/>CCPh</b>            | 8.40 (qq,<br>10)  | 7.07 (m,15H)<br>p+m-H of CCPh |                 | 6.99(8)      | 7.14(8)      |

\* qq= quasi quartet; qt= quasi triplet

**Table 2.**  $^{13}\text{C}\{^1\text{H}\}$  NMR data for complexes 1-6.

|          | <i>i</i> -C              | <i>o</i> -C              | <i>m</i> -C              | <i>p</i> -C              | C2/C6                    | C3/C5                    | C1*                     | C4              |
|----------|--------------------------|--------------------------|--------------------------|--------------------------|--------------------------|--------------------------|-------------------------|-----------------|
|          | $\nu\text{t}$ , 4C       | $\nu\text{t}$ , 8C       | $\nu\text{t}$ , 8C       | $\nu\text{t}$ , 4C       | $\nu\text{t}$ , 2C       | $\nu\text{t}$ , 2C       | $\text{t}$ , 1C         | $\text{s}$ , 1C |
|          | ( $\nu$ ) <sub>P-C</sub> | ( $\nu$ ) <sub>P-C</sub> | ( $\nu$ ) <sub>P-C</sub> | ( $\nu$ ) <sub>C-P</sub> | ( $\nu$ ) <sub>P-C</sub> | ( $\nu$ ) <sub>P-C</sub> | ( $^2$ ) <sub>C-P</sub> |                 |
| <b>1</b> | 132.0<br>(15.5)          | 128.39<br>(5.3)          | 131.8<br>(7)             | 131.41<br>(8)            | 167.05<br>(11.0)         | 106.60<br>(6.8)          | 128.7<br>(8.3)          | 129.4           |
| <b>2</b> | 132.27<br>(28.98)        | 128.55<br>(5)            | 131.33 (4)               |                          | 167.08<br>(11.3)         | 106.29<br>(7.1)          | 129.37<br>(24.4)        | 130.81          |
| <b>3</b> | 131.61<br>(25.2)         | 129.3<br>(7)             | 132.74 (7)               |                          | 168.6<br>(10.8)          | 107.6<br>(6.8)           | 130.48<br>(4.2)         | 131.31          |
| <b>4</b> | 135.2<br>(11)            | 131.37<br>(9.4)          | 132.75 (7)               |                          | 168.71<br>(10.8)         | 107.6<br>(6.8)           | 130.97<br>(3.3)         | 130.4           |
| <b>5</b> | 131.23<br>(9.7)          | 129.45<br>(4.8)          | 132.45 (6.8)             |                          | 168.72<br>(2.0)          | 107.5<br>(3.0)           | 129.23<br>(4.1)         | 132.8           |
| <b>6</b> | 133.7<br>(24.9)          | 128.24<br>(5)            | 131.6<br>(7.2)           | 130.84                   | 167.0                    | 106.0<br>(6.7)           | 128.76<br>(6.2)         | 130.6           |

\* The signals of the quaternary carbons are very weak.

**UV-Vis curves for complexes (POCOP<sup>i-Pr</sup>)Ni-OCOCH<sub>3</sub>, (POCOP<sup>i-Pr</sup>)Ni-OSO<sub>2</sub>CF<sub>3</sub> and complexes 2-6**

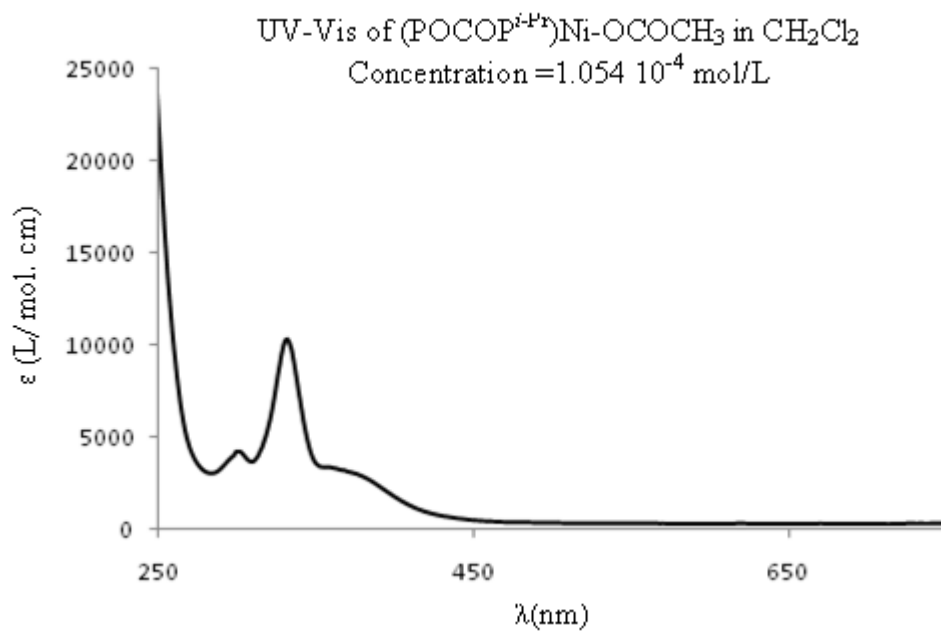

UV-Vis of (POCOP<sup>i+1</sup>)Ni-OSO<sub>2</sub>CF<sub>3</sub> in CH<sub>2</sub>Cl<sub>2</sub>  
Concentration = 1.054 10<sup>-4</sup> mol/L

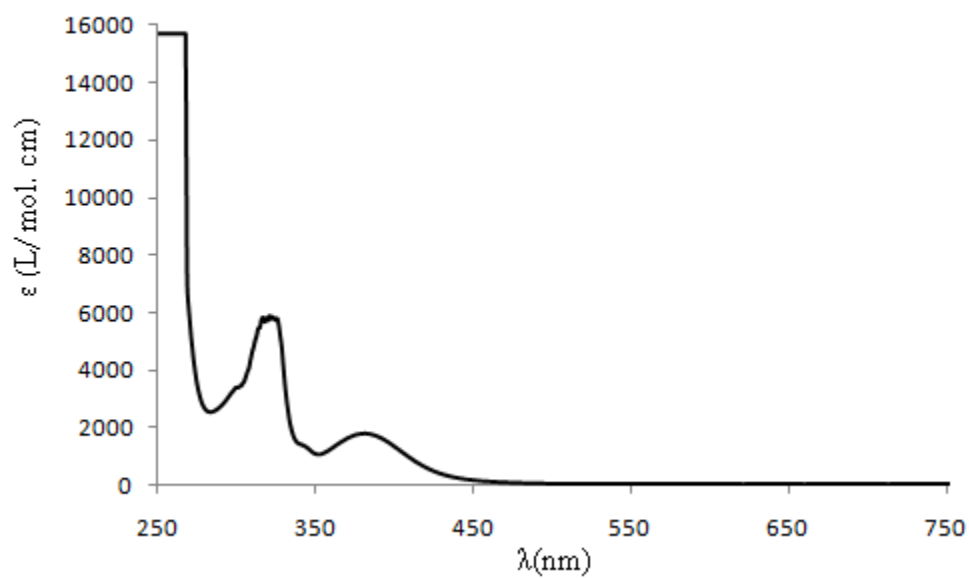

UV-Vis of complex **2** in CH<sub>2</sub>Cl<sub>2</sub>  
Concentration = 1.11 10<sup>-4</sup> mol/L

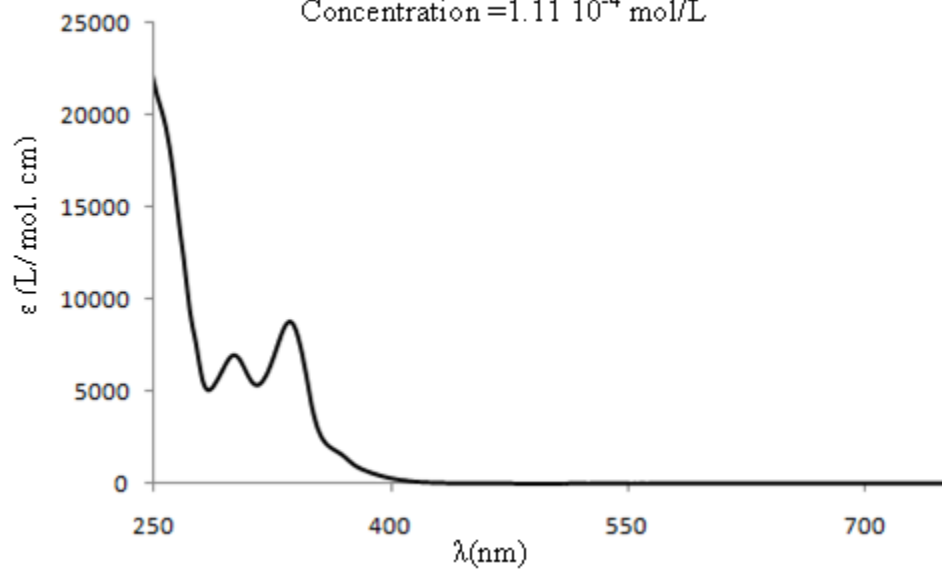

UV-Vis of complex **3** in CH<sub>2</sub>Cl<sub>2</sub>  
Concentration =  $1.27 \cdot 10^{-4}$  mol/L

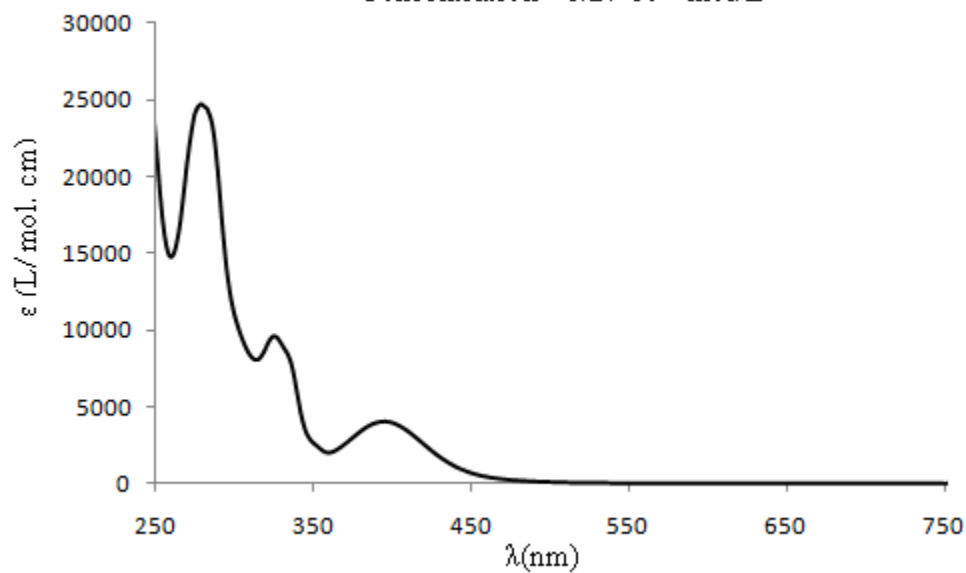

UV-Vis of complex **4** in CH<sub>2</sub>Cl<sub>2</sub>  
Concentration =  $5.6 \cdot 10^{-5}$  mol/L

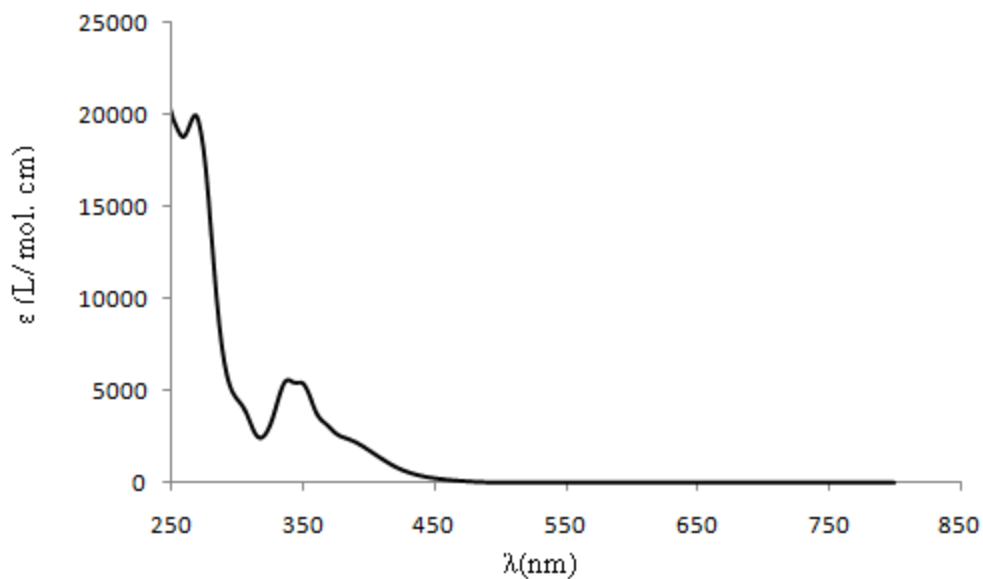

UV-Vis of complex **5** in CH<sub>2</sub>Cl<sub>2</sub>  
Concentration =  $5.80 \cdot 10^{-4}$  mol/L

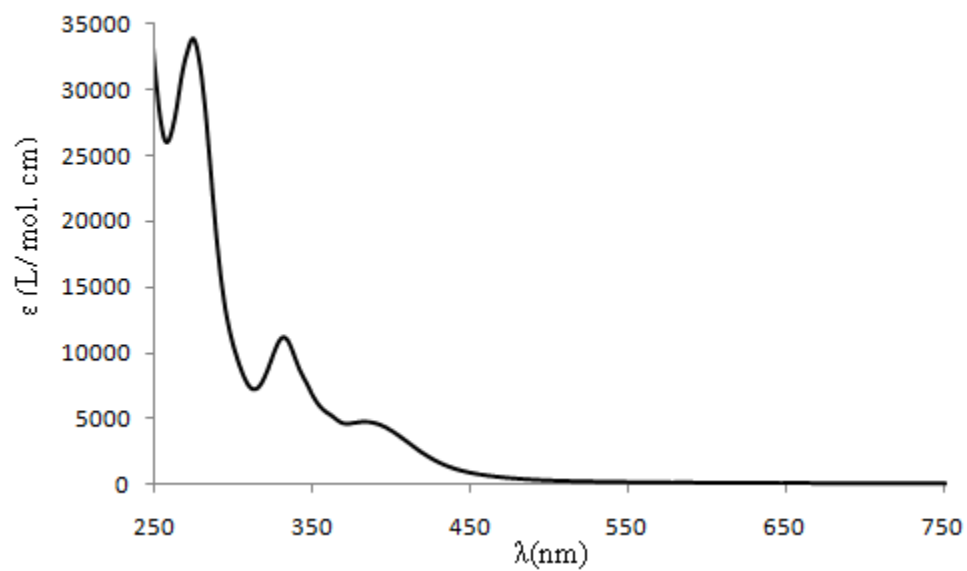

UV-Vis of complex **6** in CH<sub>2</sub>Cl<sub>2</sub>  
Concentration =  $7.8510^{-5}$  mol/L

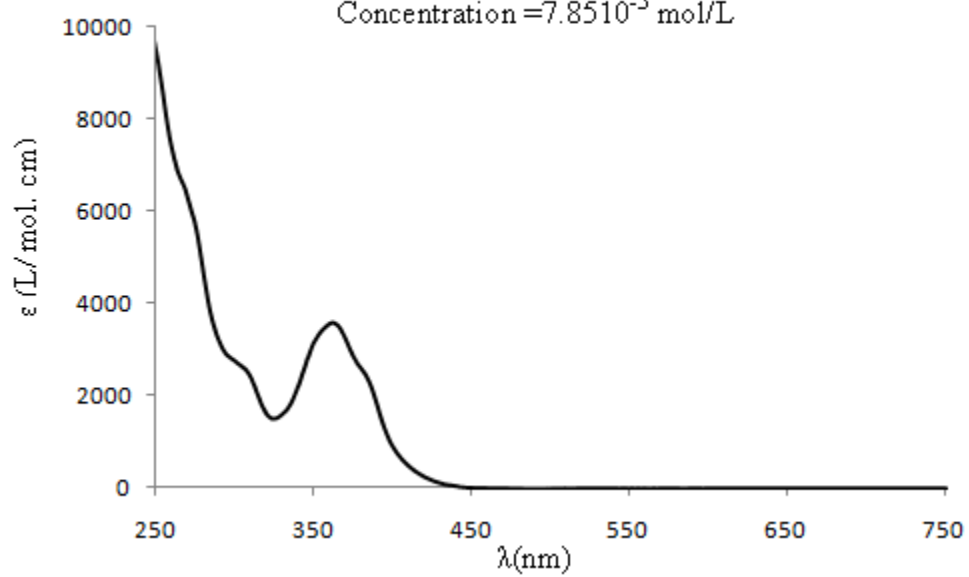

Supplement: c1dt10381d.pdf [file c1dt10381d.pdf]
